# Supplementary material for: Disruptions of Circadian Genes in Cutaneous Melanoma—An In Silico Analysis of Transcriptome Databases
Source: MDPI journal article supplement (doi:10.3390/ijms241210140), 2023-06-14
Supplement: s1 [file s1]

Supplemental Table S1. Core circadian genes selected for the in siclico analysis

| L.p . | Gene           | Gene name                                     | Entrez ID | ID of transcript | Function                                                                                                                                                                                                                                                                                                                   |                                                                                                                                   |
|-------|----------------|-----------------------------------------------|-----------|------------------|----------------------------------------------------------------------------------------------------------------------------------------------------------------------------------------------------------------------------------------------------------------------------------------------------------------------------|-----------------------------------------------------------------------------------------------------------------------------------|
| 1     | <i>NR1D1</i>   | Nuclear receptor subfamily 1 group d member 1 | 9572      | NM_021724.5      | The transcription factors, a members of the nuclear receptor subfamily 1 specifically the NR1 subfamily of receptors. The encoded protein is a ligand-sensitive transcription factor that negatively regulates the expression of core clock proteins. In particular this protein represses the BMAL1                       | <a href="https://www.genecard.org/cgi-bin/carddisp.pl?gene=NR1D1">https://www.genecard.org/cgi-bin/carddisp.pl?gene=NR1D1</a>     |
| 2     | <i>NR1D2</i>   | Nuclear receptor subfamily 1 group d member 2 | 9975      | NM_001145425.2   |                                                                                                                                                                                                                                                                                                                            | <a href="https://www.genecard.org/cgi-bin/carddisp.pl?gene=NR1D2">https://www.genecard.org/cgi-bin/carddisp.pl?gene=NR1D2</a>     |
| 3     | <i>DBP</i>     | D-box binding PAR bZIP transcription factor   | 1628      | NM_001352. 5     | A member of the PAR bZIP transcription factor family and binds to specific sequences in the promoters of several gene bind DNA as a homo- or heterodimer and is involved in the regulation of some circadian rhythm gene.                                                                                                  | <a href="https://www.genecard.org/cgi-bin/carddisp.pl?gene=DBP">https://www.genecard.org/cgi-bin/carddisp.pl?gene=DBP</a>         |
| 4     | <i>TEF</i>     | Tef, par bzip transcription factor            | 7008      | NM_001145398.3   | A member of the PAR (proline and acidic amino acid-rich) subfamily of basic region/leucine zipper (bZIP) transcription factors.                                                                                                                                                                                            | <a href="https://www.genecard.org/cgi-bin/carddisp.pl?gene=TEF">https://www.genecard.org/cgi-bin/carddisp.pl?gene=TEF</a>         |
| 5     | <i>HLF</i>     | Par bzip transcription factor                 | 3131      | NM_001330375.2   | A member of the proline and acidic-rich (PAR) protein family, a subset of the bZIP transcription factors                                                                                                                                                                                                                   | <a href="https://www.genecard.org/cgi-bin/carddisp.pl?gene=HLF">https://www.genecard.org/cgi-bin/carddisp.pl?gene=HLF</a>         |
| 6     | <i>BHLHE40</i> | Basic helix-loop-helix family member e40      | 8553      | NM_003670.3      | A basic helix-loop-helix protein interact with ARNTL or compete for E-box binding sites in the promoter of PER1 and repress CLOCK/ARNTL's transactivation of PER1.                                                                                                                                                         | <a href="https://www.genecard.org/cgi-bin/carddisp.pl?gene=BHLHE40">https://www.genecard.org/cgi-bin/carddisp.pl?gene=BHLHE40</a> |
| 7     | <i>BHLHE41</i> | Basic helix-loop-helix family member e41      | 79365     | NM_030762.3      | A basic helix-loop-helix protein expressed in various tissues. The encoded protein can interact with ARNTL or compete for E-box binding sites in the promoter of PER1 and repress CLOCK/ARNTL's transactivation of PER1. This gene is believed to be involved in the control of circadian rhythm and cell differentiation. | <a href="https://www.genecard.org/cgi-bin/carddisp.pl?gene=BHLHE41">https://www.genecard.org/cgi-bin/carddisp.pl?gene=BHLHE41</a> |

Supplemental Table S1. Core circadian genes selected for the in siclico analysis

|    |             |                                |           |      |                |                                                                                                                                                                                                                                                                                                                                                                                                                                              |                                                                                                                             |
|----|-------------|--------------------------------|-----------|------|----------------|----------------------------------------------------------------------------------------------------------------------------------------------------------------------------------------------------------------------------------------------------------------------------------------------------------------------------------------------------------------------------------------------------------------------------------------------|-----------------------------------------------------------------------------------------------------------------------------|
| 8  | <i>PER1</i> | Period clock 1                 | circadian | 5187 | NM_002616.3    | Period family of genes and is expressed in a circadian pattern in the suprachiasmatic nucleus, the primary circadian pacemaker in the mammalian brain. Genes in this family encode components of the circadian rhythms of locomotor activity, metabolism, and behavior. This gene is upregulated by CLOCK/ARNTL heterodimers but then represses this upregulation in a feedback loop using PER/CRY heterodimers to interact with CLOCK/ARNTL | <a href="https://www.genecard.org/cgi-bin/carddisp.pl?gene=PER1">https://www.genecard.org/cgi-bin/carddisp.pl?gene=PER1</a> |
| 9  | <i>PER2</i> | Period clock 2                 | circadian | 8864 | NM_022817.3    |                                                                                                                                                                                                                                                                                                                                                                                                                                              | <a href="https://www.genecard.org/cgi-bin/carddisp.pl?gene=PER2">https://www.genecard.org/cgi-bin/carddisp.pl?gene=PER2</a> |
| 10 | <i>PER3</i> | Period clock 3                 | circadian | 8863 | NM_001289861.2 |                                                                                                                                                                                                                                                                                                                                                                                                                                              | <a href="https://www.genecard.org/cgi-bin/carddisp.pl?gene=PER3">https://www.genecard.org/cgi-bin/carddisp.pl?gene=PER3</a> |
| 11 | <i>CRY1</i> | Cryptochrome circadian clock 1 |           | 1407 | NM_004075.5    | A flavin adenine dinucleotide-binding protein that is a key component of the circadian core oscillator complex, which regulates the circadian clock. This gene is upregulated by CLOCK/ARNTL heterodimers but then represses this upregulation in a feedback loop using PER/CRY heterodimers to interact with CLOCK/ARNTL.                                                                                                                   | <a href="https://www.genecard.org/cgi-bin/carddisp.pl?gene=CRY1">https://www.genecard.org/cgi-bin/carddisp.pl?gene=CRY1</a> |
| 12 | <i>CRY2</i> | Cryptochrome circadian clock 2 |           | 1408 | NM_001127457.3 |                                                                                                                                                                                                                                                                                                                                                                                                                                              | <a href="https://www.genecard.org/cgi-bin/carddisp.pl?gene=CRY2">https://www.genecard.org/cgi-bin/carddisp.pl?gene=CRY2</a> |
| 13 | <i>RORA</i> | Rar orphan receptor a          | related   | 6095 | NM_002943.4    | The members of the NR1 subfamily of nuclear hormone receptors. It can bind as a monomer or as a homodimer to hormone response elements upstream of several genes to enhance the expression of those genes.                                                                                                                                                                                                                                   | <a href="https://www.genecard.org/cgi-bin/carddisp.pl?gene=RORA">https://www.genecard.org/cgi-bin/carddisp.pl?gene=RORA</a> |
| 14 | <i>RORB</i> | Rar orphan receptor b          | related   | 6096 | NM_006914.34   |                                                                                                                                                                                                                                                                                                                                                                                                                                              | <a href="https://www.genecard.org/cgi-bin/carddisp.pl?gene=RORB">https://www.genecard.org/cgi-bin/carddisp.pl?gene=RORB</a> |
| 15 | <i>RORC</i> | Rar orphan receptor c          | related   | 6097 | NM_001001523.2 |                                                                                                                                                                                                                                                                                                                                                                                                                                              | <a href="https://www.genecard.org/cgi-bin/carddisp.pl?gene=RORC">https://www.genecard.org/cgi-bin/carddisp.pl?gene=RORC</a> |

Supplemental Table S1. Core circadian genes selected for the in siclico analysis

|    |                               |                                                     |       |                |                                                                                                                                                                                                                                                                                                                                                                                  |                                                                                                                                     |
|----|-------------------------------|-----------------------------------------------------|-------|----------------|----------------------------------------------------------------------------------------------------------------------------------------------------------------------------------------------------------------------------------------------------------------------------------------------------------------------------------------------------------------------------------|-------------------------------------------------------------------------------------------------------------------------------------|
| 16 | <i>NFIL3</i>                  | Nuclear factor, interleukin 3 regulated             | 4783  | NM_001289999.2 | A transcriptional regulator that binds as a homodimer to activating transcription factor (ATF) sites in many cellular and viral promoters. The encoded protein represses PER1 and PER2 expression and therefore plays a role in the regulation of circadian rhythm.                                                                                                              | <a href="https://www.genecard.org/cgi-bin/carddisp.pl?gene=NFIL3">https://www.genecard.org/cgi-bin/carddisp.pl?gene=NFIL3</a>       |
| 17 | <i>ARNTL</i><br><i>/BMAL1</i> | Aryl hydrocarbon receptor nuclear translocator like | 406   | NM_001030272.3 | A basic helix-loop-helix protein that forms a heterodimer with CLOCK. This heterodimer binds E-box enhancer elements upstream of Period (PER1, PER2, PER3) and Cryptochrome (CRY1, CRY2) genes and activates transcription of these genes. PER and CRY proteins heterodimerize and repress their own transcription by interacting in a feedback loop with CLOCK/ARNTL complexes. | <a href="https://www.genecard.org/cgi-bin/carddisp.pl?gene=BMAL1">https://www.genecard.org/cgi-bin/carddisp.pl?gene=BMAL1</a>       |
| 18 | <i>CLOCK</i>                  | Clock circadian regulator                           | 9575  | NM_001289826.2 | A transcription factor of the basic helix-loop-helix (bHLH) family and contains DNA binding histone acetyltransferase activity<br>The encoded protein forms a heterodimer with ARNTL (BMAL1) that binds E-box enhancer elements upstream of Period (PER1, PER2, PER3) and Cryptochrome (CRY1, CRY2) genes and activates transcription of these genes.                            | <a href="https://www.genecard.org/cgi-bin/carddisp.pl?gene=CLOCK">https://www.genecard.org/cgi-bin/carddisp.pl?gene=CLOCK</a>       |
| 19 | <i>NPAS2</i>                  | Neuronal pas domain protein 2                       | 4862  | NM_002518.4    | A member of the basic helix-loop-helix (bHLH)-PAS family of transcription factors                                                                                                                                                                                                                                                                                                | <a href="https://www.genecard.org/cgi-bin/carddisp.pl?gene=NPAS2">https://www.genecard.org/cgi-bin/carddisp.pl?gene=NPAS2</a>       |
| 20 | <i>CIPC</i>                   | Clock interacting pacemaker                         | 85457 | NM_033426.3    | A negative regulator of circadian rhythm and negative regulation of transcription, DNA-templated.                                                                                                                                                                                                                                                                                | <a href="https://www.genecard.org/cgi-bin/carddisp.pl?gene=CIPC">https://www.genecard.org/cgi-bin/carddisp.pl?gene=CIPC</a>         |
| 21 | <i>CSNK1A1L</i>               | Casein kinase 1 alpha 1 like                        | 12011 | NM_145203.6    | A protein serine/threonine kinase activity transferase activity, transferring phosphorus-containing groups and protein tyrosine kinase activity. An important paralog of this gene is CSNK1A1.                                                                                                                                                                                   | <a href="https://www.genecard.org/cgi-bin/carddisp.pl?gene=CSNK1A1L">https://www.genecard.org/cgi-bin/carddisp.pl?gene=CSNK1A1L</a> |

Supplemental Table S1. Core circadian genes selected for the in siclico analysis

|    |                 |                              |   |      |                |                                                                                                                                                                                                                                                                                                                                                                                                                                         |                                                                                                                                       |
|----|-----------------|------------------------------|---|------|----------------|-----------------------------------------------------------------------------------------------------------------------------------------------------------------------------------------------------------------------------------------------------------------------------------------------------------------------------------------------------------------------------------------------------------------------------------------|---------------------------------------------------------------------------------------------------------------------------------------|
| 22 | <i>CSNK1A1</i>  | Casein kinase alpha 1        | 1 | 1452 | NM_001025105.3 |                                                                                                                                                                                                                                                                                                                                                                                                                                         | <a href="https://www.genecards.org/cgi-bin/carddisp.pl?gene=CSNK1A1">https://www.genecards.org/cgi-bin/carddisp.pl?gene=CSNK1A1</a>   |
| 23 | <i>CSNK1E</i>   | Casein kinase epsilon        | 1 | 1454 | NM_001894.6    | Aserine/threonine protein kinase and a member of the casein kinase I protein family, whose members have been implicated in the control of cytoplasmic and nuclear processes, including DNA replication and repair.                                                                                                                                                                                                                      | <a href="https://www.genecards.org/cgi-bin/carddisp.pl?gene=CSNK1E">https://www.genecards.org/cgi-bin/carddisp.pl?gene=CSNK1E</a>     |
| 24 | <i>TIMELESS</i> | Timeless circadian regulator |   | 8914 | NM_001330295.3 | The protein encoded by this gene is highly conserved and is involved in cell survival after damage or stress, increase in DNA polymerase epsilon activity, maintenance of telomere length, and epithelial cell morphogenesis. The encoded protein also plays a role in the circadian rhythm autoregulatory loop, interacting with the PERIOD genes (PER1, PER2, and PER3) and others to downregulate activation of PER1 by CLOCK/ARNTL. | <a href="https://www.genecards.org/cgi-bin/carddisp.pl?gene=TIMELESS">https://www.genecards.org/cgi-bin/carddisp.pl?gene=TIMELESS</a> |
